# Supplementary material for: Biological quality control for cardiopulmonary exercise testing in multicenter clinical trials
Source: PubMed Central journal article supplement (PMC4715309; doi:10.1186/s12890-016-0174-8), 2016-01-16
Supplement: 12890_2016_174_MOESM2_ESM.pdf [file 12890_2016_174_MOESM2_ESM.pdf]

**Table S2 Equipment used at the study centers**

| Center | CPET equipment                                      | Software version                              | Flow sensor                                   | Treadmill                                      |
|--------|-----------------------------------------------------|-----------------------------------------------|-----------------------------------------------|------------------------------------------------|
| 1      | SensorMedics <sup>a</sup>                           | Vmax <sup>TM</sup> Spectra 12-7 <sup>a</sup>  | Mass flow sensor                              | GE Marquette Series 2000 <sup>b</sup>          |
| 2      | Medical Graphics <sup>®</sup> Ultima <sup>TMc</sup> | 7.0.0.26                                      | preVent <sup>®</sup> flow sensor <sup>c</sup> | Trackmaster <sup>®</sup> TMX425 <sup>d</sup>   |
| 3      | SensorMedics <sup>a</sup>                           | Vmax <sup>TM</sup> Spectra 12-3A <sup>a</sup> | Mass flow sensor                              | Trackmaster <sup>®</sup> TMX425C <sup>d</sup>  |
| 4      | Medical Graphics <sup>®</sup> Ultima <sup>TMc</sup> | 6.4                                           | preVent <sup>®</sup> flow sensor <sup>c</sup> | Trackmaster <sup>®</sup> TMX425C <sup>d</sup>  |
| 5      | SensorMedics <sup>a</sup>                           | Vmax <sup>TM</sup> Encore 20-7 <sup>a</sup>   | Mass flow sensor                              | Trackmaster <sup>®</sup> TMX425 <sup>d</sup>   |
| 6      | Medical Graphics <sup>®c</sup>                      | 6.4.1.44sp4                                   | Pitot tube                                    | Trackmaster <sup>®</sup> TMX425CP <sup>d</sup> |
| 7      | SensorMedics <sup>a</sup>                           | Vmax <sup>TM</sup> Encore 20-B <sup>a</sup>   | Mass flow sensor                              | Trackmaster <sup>®</sup> TMX425 <sup>d</sup>   |
| 8      | SensorMedics <sup>a</sup>                           | Vmax <sup>TM</sup> Encore 20-5B <sup>a</sup>  | Mass flow sensor                              | Trackmaster <sup>®</sup> TMX425 <sup>d</sup>   |
| 9      | SensorMedics <sup>a</sup>                           | Vmax <sup>TM</sup> Spectra 12-3A <sup>a</sup> | Mass flow sensor                              | GE Marquette Series 2000 <sup>b</sup>          |
| 10     | SensorMedics <sup>a</sup>                           | Vmax <sup>TM</sup> Encore 21-1A <sup>a</sup>  | Mass flow sensor                              | GE Marquette Series 2000 <sup>b</sup>          |
| 11     | SensorMedics <sup>a</sup>                           | Vmax <sup>TM</sup> Legacy 7-2B <sup>a</sup>   | Mass flow sensor                              | GE T-2100 <sup>b</sup>                         |
| 12     | Medisoft Expair <sup>e</sup>                        | 1.28.20                                       | Pitot Tube                                    | GE Marquette Series 2000 <sup>b</sup>          |
| 13     | SensorMedics <sup>a</sup>                           | Vmax <sup>TM</sup> Spectra 12-2A <sup>a</sup> | Mass flow sensor                              | Woodway Desmo <sup>f</sup>                     |
| 14     | SensorMedics <sup>a</sup>                           | Vmax <sup>TM</sup> Spectra 12-1A <sup>a</sup> | Mass flow sensor                              | Quinton MedTrack ST55 <sup>g,h</sup>           |
| 15     | Medical Graphics <sup>®c</sup>                      | 6.4.1.44sp4                                   | preVent <sup>®</sup> flow sensor <sup>c</sup> | Trackmaster <sup>®</sup> TMX425 <sup>d</sup>   |

<sup>a</sup>Sensormedics, Yorba Linda, CA, USA.

<sup>b</sup>GE, Fairfield, CT, USA.

<sup>c</sup>Medical Graphics Corporation, St Paul, MN, USA.

<sup>d</sup>Trackmaster, Newton, KS, USA.

<sup>e</sup>Medisoft, Sorinnes, Belgium.

<sup>f</sup>Woodway, Waukesha, WI, USA.

<sup>g</sup>Quinton Instrument Co., Bothell, WA, USA.

<sup>h</sup>The treadmill was manually adjusted from its own controller (a pre-approved procedure).
